# Supplementary material
Source: PubMed Central journal article supplement (PMC3771578)

Fig. 1a

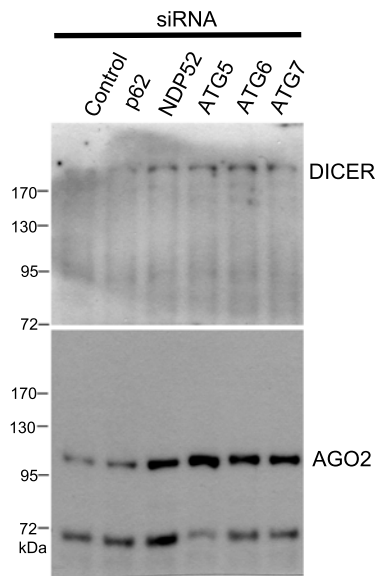

Fig. 1b

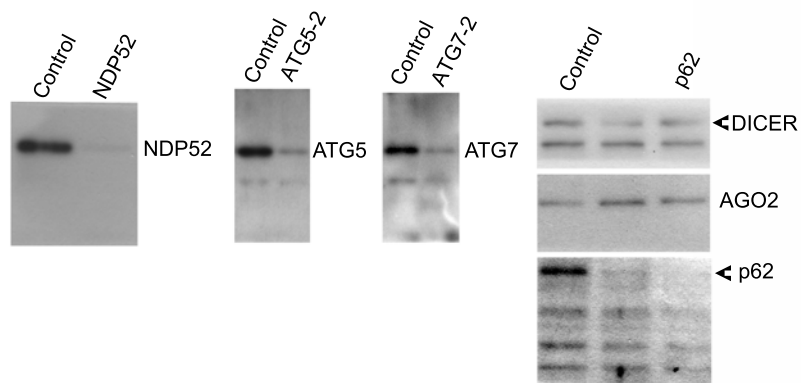

Fig. 1f

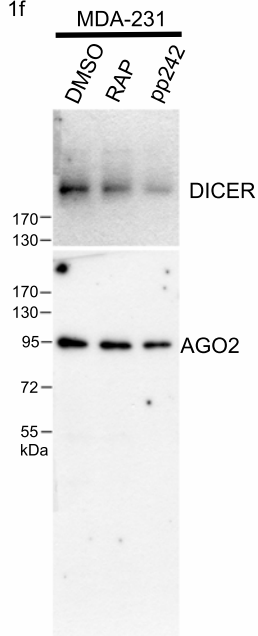

Fig. 3b

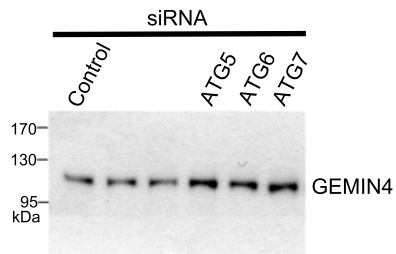

Fig. 3h

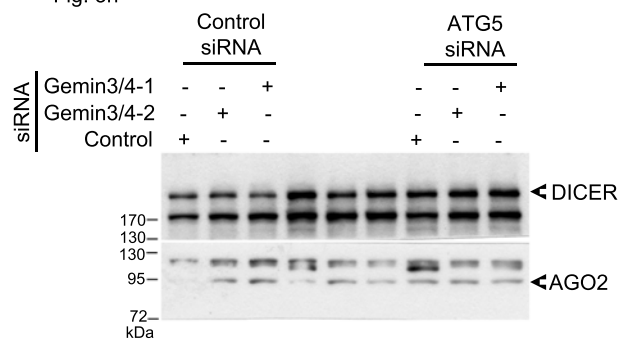

Supplement: NIHMS54678-supplement-4.pdf [file NIHMS54678-supplement-4.pdf]
